# Supplementary material
Source: publisher figshare collection journal article supplement (https://sage.figshare.com/ndownloader/files/18811268)
Supplement: Supplementary file 1 [file 18811268]

# Supplementary File A

## Search Strategy

|   | Database  | Search Phrase                                                                                                                                                                                                                                                                                                                                                                                                                                                                                                                                                                                                                                                                                                                                                                                                                                                                                                                                                                                                                                |
|---|-----------|----------------------------------------------------------------------------------------------------------------------------------------------------------------------------------------------------------------------------------------------------------------------------------------------------------------------------------------------------------------------------------------------------------------------------------------------------------------------------------------------------------------------------------------------------------------------------------------------------------------------------------------------------------------------------------------------------------------------------------------------------------------------------------------------------------------------------------------------------------------------------------------------------------------------------------------------------------------------------------------------------------------------------------------------|
| 1 | PubMed    | ((("burnout" OR "Burnout, Professional"[Mesh] OR "burnout" [Tiab] OR "burn* out")) AND ("Nurse Practitioners"[Mesh] OR "advance* practice nurse*" [Tiab] "advance* practice nurse*" OR "nurse practitioner*" [Tiab] OR "nurse practitioner*" OR "primary care provider*" OR "doctor*" [Tiab] OR "clinician*" [Tiab] OR "clinician*" OR "Physicians"[Mesh] OR "physician*" [Tiab] OR "physician*" OR "physician assistant*" OR "physician assistant*" [Tiab]) AND ("factor*" OR "factor*" [Tiab] OR "lead*" OR "lead*" [Tiab] OR "led*" OR "led*" [Tiab] OR "associate*" OR "associate*" [Tiab] OR "predictor*" OR "predictor*" [Tiab] OR "cause*" [Tiab] OR "cause*" OR "outcome*" OR "outcome*" [Tiab] OR "consequence*" OR "consequence*" [Tiab])) AND ("primary care" OR "primary care" [Tiab]))                                                                                                                                                                                                                                          |
| 2 | Embase    | ('burnout'/exp OR burnout:ti,ab OR 'burn* out'/exp OR burn* out:ti,ab) AND ('clinician*'/exp OR clinician*:ti,ab OR 'physician*'/exp OR physician*:ti,ab<br>OR 'doctor*'/exp OR doctor*:ti,ab OR 'nurse practitioner*'/exp OR 'nurse practitioner*' OR 'physician assistant*'/exp OR 'physician assistant*' OR 'primary care provider*'/exp OR 'primary care provider*' OR 'advance* practice nurse*'/exp OR 'advance* practice nurse*' OR primary AND ('care'/exp OR care) OR nurse* AND practitioner*:ti,ab OR advance* AND practice AND nurse*:ti,ab) AND ('factor*' OR 'cause*' OR 'outcome*' OR 'predictor*' OR 'consequence*' OR 'led*' OR 'lead*' OR 'associate*')<br>('burnout') AND ('physician*' OR 'nurse practitioner*' OR 'advance* practice nurse*' OR 'general practitioner*' OR 'primary care provider*' OR 'physician assistant*') AND ('primary medical care' OR 'primary health care') AND ('predictors*' OR 'outcomes*' OR 'consequences*' OR 'led*' OR 'lead*' OR 'associate*')<br>'burn*out' AND 'primary health care' |
| 3 | PyschINFO | ("burnout" or "burn*out") and ("clinician*" or "doctor*" or "physician*" or "primary care provider*" or "nurse practitioner*" or "advance* practice nurse*" or "physician assistant*") and ("primary care") and ("outcome*" or "predictor*" or "factor*" or "consequence*" or "led*" or "lead*" or "associate*" or "cause*")                                                                                                                                                                                                                                                                                                                                                                                                                                                                                                                                                                                                                                                                                                                 |

|   |                                                                  |                                                                                                                                                                                                                                                                                                                                                                                                                                                                                                                                                                                |
|---|------------------------------------------------------------------|--------------------------------------------------------------------------------------------------------------------------------------------------------------------------------------------------------------------------------------------------------------------------------------------------------------------------------------------------------------------------------------------------------------------------------------------------------------------------------------------------------------------------------------------------------------------------------|
|   |                                                                  | ((primary care provider*.ti,ab.) OR (nurse practitioner*.ti,ab.) OR (advance* practice nurse*.ti,ab.) OR (physician assistant*.ti,ab.) OR (physician*.ti,ab.) OR (primary care physician*.ti,ab.)) AND ((burn*out.ti,ab.) OR (burned out.ti,ab.)) AND ((factor*.ti,ab.) OR (outcome*.ti,ab.) OR (cause*.ti,ab.) OR (consequence*.ti,ab.) OR (predictor*.ti,ab.) OR (led*.ti,ab.) OR (lead*.ti,ab.) OR (associate*.ti,ab.)) AND (primary care.ti,ab.))                                                                                                                          |
| 4 | ProQuest <sup>^</sup>                                            | ("burnout" OR "burn* out") AND ("nurse practitioner*" OR "advance* practice nurse*" OR "physician*" OR "doctor*" OR "clinician*" OR "physician assistant*" OR "primary care provider*") AND ("primary care") AND ("outcome*" OR "factor*" OR "predictor*" OR "consequence*" OR "associate*" OR "lead*" OR "led*" OR "cause*")                                                                                                                                                                                                                                                  |
| 5 | Joanna Briggs Institute Evidenced-Based Practice Database        | ("burnout" or "burn* out") and ("clinician*" or "doctor*" or "physician*" or "primary care provider*" or "nurse practitioner*" or "advance* practice nurse*" or "physician assistant*") and ("primary care") and ("outcome*" or "predictor*" or "factor*" or "consequence*" or "associate*" or "led*" or "lead*" or "cause*")                                                                                                                                                                                                                                                  |
|   |                                                                  | ("burnout" or "burn* out") and ("clinician*" or "doctor*" or "physician*" or "primary care provider*" or "nurse practitioner*" or "advance* practice nurse*" or "physician assistant*") and ("primary care")                                                                                                                                                                                                                                                                                                                                                                   |
| 6 | Ovid Medline                                                     | ('burnout' or 'burn* out') and 'primary care' and ('physician*' or 'nurse practitioner*' or 'advance* practice nurse*' or 'physician assistant*' or 'clinician*' or 'doctor*' or 'primary care provider*') and ('outcome*' or 'predictor*' or 'factor*' or 'consequence*' or 'associate*' or 'led*' or 'lead*' or 'cause*').mp. [mp=title, abstract, original title, name of substance word, subject heading word, floating sub-heading word, keyword heading word, protocol supplementary concept word, rare disease supplementary concept word, unique identifier, synonyms] |
| 7 | CINAHL- Cumulative Index to Nursing and Allied Health Literature | ((TI burnout AND AB burnout) OR (TI burn* out AND AB burn* out)) AND ((TI nurse practitioner* AND AB nurse practitioner*) OR (TI advance* practice nurse* AND AB advance* practice nurse*) OR (TI physician* AND AB physician*) OR (TI doctor* AND AB doctor*) OR (TI physician assistant* AND AB physician assistant*) OR (TI primary care provider* AND AB primary care provider*) OR (TI clinician* AND AB clinician*) OR ((MH "Nurse Practitioner*") OR (MH "Physician Assistant*") OR (MH "Physician*"))                                                                  |
|   |                                                                  | ("burnout" OR "burn* out") AND ("nurse practitioner*" OR "advance* practice nurse*" OR "physician*" OR "doctor*" OR "clinician*" OR "primary care provider*" OR "physician assistant*") AND ("primary care") AND ("outcome*" OR "factor*" OR "predictor*" OR "consequence*" OR "associate*" OR "led*" OR "lead*" OR "cause*")                                                                                                                                                                                                                                                  |

|   |                  |                                                                                                                                                                                                                                                                                                                                                        |
|---|------------------|--------------------------------------------------------------------------------------------------------------------------------------------------------------------------------------------------------------------------------------------------------------------------------------------------------------------------------------------------------|
| 8 | Cochrane Library | ("burnout" or "burn* out") and ("clinician*" or "doctor*" or "physician*" or "primary care provider*" or "nurse practitioner*" or "advance* practice nurse*" or "nurse practitioner*" or "physician assistant*") and ("primary care") and ("factor*" or "predictor*" or "consequence*" or "associate*" or "led*" or "lead*" or "cause*" or "outcome*") |
|   |                  | ("burnout" or "burn* out") and ("clinician*" or "doctor*" or "physician*" or "primary care provider*" or "nurse practitioner*" or "advance* practice nurse*" or "nurse practitioner*" or "physician assistant*") and ("primary care")                                                                                                                  |

*Note.* ^The authors applied an additional “burnout” filter to the search in ProQuest; To ensure that all appropriate studies were retrieved, the authors used more than one search phrase for certain databases that were yielding a low number of articles when all search terms were included; The Joanna Briggs Institute of Evidence-Based Practice (JBI EBP) was accessed through the JBI EBP database option within Ovid Medline.
